# Supplementary material
Source: HighWire-hosted journal article supplement (https://injuryprevention.bmj.com/content/28/4/301)
Supplement: inline-supplementary-material-1 [file inline-supplementary-material-1.pdf]

**Table S1:** Pooled Data Calculation of Socio Economic Status (SES)

| Data source | Calculation of SES                                                                                                                                                    |
|-------------|-----------------------------------------------------------------------------------------------------------------------------------------------------------------------|
| BCCH-LIO    | Quintiles from QAIPE which is an area-based measure, released by Statistics Canada.                                                                                   |
| CHAI        | Quintiles from a principal component created from principal components analysis using income and education variables from the CHAI data.                              |
| UKBOI       | Quintiles from area-based Townsend Deprivation Score reversed to reflect higher quintile reflecting higher SES.                                                       |
| VSTR        | Quintiles of the Index of Relative Socio-economic Advantage and Disadvantage (IRSAD) which is an area-based measure, released by the Australian Bureau of Statistics. |
