# Supplementary material
Source: HighWire-hosted journal article supplement (https://injuryprevention.bmj.com/content/28/4/301)
Supplement: inline-supplementary-material-2 [file inline-supplementary-material-2.pdf]

**Table S2:** GBD 2013 Collapsed Groups

---

|                                                                       |
|-----------------------------------------------------------------------|
| N33, N34 Spinal cord lesion (yes/no)                                  |
| N19, N26 Fracture of femur (yes/no)                                   |
| N20 Fracture of patella, tibia, fibula, or ankle (yes/no)             |
| N28 Moderate to severe traumatic brain injury (yes/no)                |
| N37, N17, N18 Crush injury, fracture foot/hand bones (yes/no)         |
| N43 Internal haemorrhage in abdomen or pelvis (yes/no)                |
| N27 Minor traumatic brain injury (yes/no)                             |
| N21 Fracture of pelvis (yes/no)                                       |
| N42 Severe chest Injury (yes/no)                                      |
| N8, N9, N10 Burns (including lower airways) (yes/no)                  |
| N25 Fracture of vertebral column (yes/no)                             |
| N35, N36 Asphyxiation, Non-fatal submersion (yes/no)                  |
| N40, N44 Contusion, open wound (yes/no)                               |
| N14 Other injuries of muscle & tendon and other dislocations (yes/no) |
| N15 Fracture of clavicle, scapula, or humerus (yes/no)                |
| N22 Fracture of radius or ulna (yes/no)                               |
| Other (yes/no)*                                                       |

---

\*Other included injuries such as amputation of one limb/toe, poisoning, injured nerves, environmental factors, injured
