# Supplementary material
Source: HighWire-hosted journal article supplement (https://injuryprevention.bmj.com/content/28/4/301)
Supplement: inline-supplementary-material-4 [file inline-supplementary-material-4.pdf]

**Table S4:** PedsQL Ordinal Mixed Effects Models (adjusted for VIBES-Junior cohort) <sup>a</sup>

| Model                     |            | TOTAL<br>Adj OR (95%CI)    | PHYSICAL<br>Adj OR (95%CI)  | PSYCHOSOCIAL<br>Adj OR (95%CI) |
|---------------------------|------------|----------------------------|-----------------------------|--------------------------------|
| <b>Sex</b>                |            |                            |                             |                                |
| Male                      | <i>Ref</i> |                            |                             |                                |
| Female                    |            | 0.78 (0.59,1.05)           | <b>0.56 (0.44,0.72) ↓</b>   | 0.90 (0.68,1.19)               |
| <b>Age group</b>          |            |                            |                             |                                |
| 0-4 years                 | <i>Ref</i> |                            |                             |                                |
| 5-9 years                 |            | <b>0.29 (0.20,0.42) ↓</b>  | <b>0.64 (0.46,0.89) ↓</b>   | <b>0.31 (0.22,0.45) ↓</b>      |
| 10-14 years               |            | <b>0.22 (0.15,0.32) ↓</b>  | <b>0.38 (0.27,0.53) ↓</b>   | <b>0.27 (0.19,0.39) ↓</b>      |
| 15-17 years               |            | <b>0.24 (0.15,0.39) ↓</b>  | <b>0.29 (0.20,0.44) ↓</b>   | <b>0.32 (0.20,0.51) ↓</b>      |
| <b>SES</b>                |            |                            |                             |                                |
| Low SES                   | <i>Ref</i> |                            |                             |                                |
| Moderate SES              |            | <b>1.74 (1.27,2.39) ↑</b>  | <b>1.57 (1.20,2.06) ↑</b>   | <b>1.55 (1.15,2.10) ↑</b>      |
| High SES                  |            | <b>2.76 (1.91,3.99) ↑</b>  | <b>2.22 (1.61,3.06) ↑</b>   | <b>2.22 (1.55,3.19) ↑</b>      |
| <b>Mechanism</b>          |            |                            |                             |                                |
| Non-transport             | <i>Ref</i> |                            |                             |                                |
| Transport                 |            | <b>0.57 (0.39,0.85) ↓</b>  | <b>0.58 (0.42,0.80) ↓</b>   | <b>0.58 (0.40,0.86) ↓</b>      |
| <b>Hospital status</b>    |            |                            |                             |                                |
| ED only                   | <i>Ref</i> |                            |                             |                                |
| Hospital admission        |            | 1.10 (0.67,1.80)           | 0.84 (0.56,1.26)            | 1.30 (0.80,2.10)               |
| <b>Comorbidity status</b> |            |                            |                             |                                |
| At least 1 comorbidity    |            | <b>0.24 (0.14,0.42) ↓</b>  | <b>0.28 (0.17,0.47) ↓</b>   | <b>0.30 (0.18,0.50) ↓</b>      |
| <b>ISS Tertiles</b>       |            |                            |                             |                                |
| Low (<5)                  | <i>Ref</i> |                            |                             |                                |
| Mid (5-16)                |            | 0.87 (0.50,1.51)           | 1.18 (0.76,1.84)            | 0.78 (0.46,1.30)               |
| High (17+)                |            | 1.00 (0.52,1.95)           | 1.25 (0.72,2.18)            | 1.02 (0.55,1.90)               |
| <b>Intent</b>             |            |                            |                             |                                |
| Not intentional           | <i>Ref</i> |                            |                             |                                |
| Intentional               |            | <b>0.33 (0.14,0.79) ↓</b>  | 0.50 (0.25,1.00)            | <b>0.35 (0.16,0.74) ↓</b>      |
| Intent not known          |            | 0.54 (0.19,1.48)           | 1.16 (0.46,2.90)            | 0.77 (0.30,1.97)               |
| <b>Time</b>               |            |                            |                             |                                |
| 1 Month                   | <i>Ref</i> |                            |                             |                                |
| 3,4 Months                |            | <b>7.68 (5.22,11.29) ↑</b> | <b>8.10 (5.38,12.20) ↑</b>  | <b>3.90 (2.81,5.43) ↑</b>      |
| 6 Months                  |            | <b>3.82 (2.59,5.65) ↑</b>  | <b>5.48 (3.62,8.28) ↑</b>   | <b>2.69 (1.91,3.80) ↑</b>      |
| 12 Months                 |            | <b>8.23 (5.67,11.94) ↑</b> | <b>11.98 (7.98,17.96) ↑</b> | <b>4.05 (2.94,5.58) ↑</b>      |
| 24 Months                 |            | <b>9.18 (6.23,13.52) ↑</b> | <b>13.78 (9.08,20.92) ↑</b> | <b>4.64 (3.31,6.51) ↑</b>      |

| <b>Injury (Any)</b>                                        |                           |                           |                           |       |
|------------------------------------------------------------|---------------------------|---------------------------|---------------------------|-------|
| N33, N34 Spinal cord lesion                                | <b>0.08 (0.02,0.29) ↓</b> | <b>0.07 (0.02,0.27) ↓</b> | <b>0.10 (0.03,0.35) ↓</b> |       |
| N19, N26 Fracture of femur                                 | <b>0.51 (0.27,0.96) ↓</b> | <b>0.29 (0.16,0.53) ↓</b> | 0.92 (0.50,1.69)          |       |
| N20 Fracture of patella, tibia, fibula, or ankle           | <b>0.33 (0.16,0.66) ↓</b> | <b>0.25 (0.14,0.46) ↓</b> | <b>0.45 (0.22,0.88) ↓</b> |       |
| N28 Moderate to severe traumatic brain injury              | <b>0.57 (0.37,0.89) ↓</b> | 0.77 (0.53,1.12)          | <b>0.57 (0.38,0.88) ↓</b> |       |
| N37, N17, N18 Crush injury, fracture foot/hand bones       | 0.68 (0.30,1.53)          | 0.92 (0.43,1.95)          | 0.69 (0.32,1.48)          |       |
| N43 Internal haemorrhage in abdomen or pelvis              | 0.95 (0.56,1.61)          | 1.02 (0.64,1.62)          | 1.00 (0.61,1.65)          |       |
| N27 Minor traumatic brain injury                           | 0.78 (0.56,1.10)          | 0.80 (0.60,1.05)          | 0.76 (0.54,1.05)          |       |
| N21 Fracture of pelvis                                     | <b>0.44 (0.21,0.92) ↓</b> | <b>0.30 (0.16,0.58) ↓</b> | 0.63 (0.33,1.21)          |       |
| N42 Severe chest Injury                                    | <b>0.50 (0.29,0.86) ↓</b> | 0.65 (0.41,1.04)          | <b>0.55 (0.32,0.92) ↓</b> |       |
| N8, N9, N10 Burns (including lower airways)                | 0.38 (0.13,1.15)          | <b>0.32 (0.13,0.81) ↓</b> | 0.53 (0.20,1.38)          |       |
| N25 Fracture of vertebral column                           | <b>0.37 (0.18,0.77) ↓</b> | <b>0.43 (0.23,0.84) ↓</b> | <b>0.43 (0.22,0.83) ↓</b> |       |
| N35, N36 Asphyxiation, Non-fatal submersion                | <b>0.08 (0.02,0.38) ↓</b> | 0.46 (0.12,1.71)          | <b>0.11 (0.03,0.42) ↓</b> |       |
| N40, N44 Contusion, open wound                             | 1.02 (0.71,1.46)          | 1.20 (0.89,1.61)          | 0.92 (0.64,1.31)          |       |
| N14 Other injuries of muscle & tendon & other dislocations | <b>0.52 (0.31,0.88) ↓</b> | <b>0.61 (0.38,0.96) ↓</b> | <b>0.54 (0.32,0.91) ↓</b> |       |
| N15 Fracture of clavicle, scapula, or humerus              | 0.77 (0.49,1.21)          | 0.71 (0.49,1.02)          | 0.70 (0.45,1.09)          |       |
| N22 Fracture of radius or ulna                             | 0.78 (0.49,1.24)          | 0.70 (0.48,1.04)          | 0.81 (0.51,1.26)          |       |
| Other injuries                                             | <b>0.55 (0.39,0.78) ↓</b> | <b>0.68 (0.51,0.91) ↓</b> | <b>0.53 (0.38,0.74) ↓</b> |       |
| <i>Number of Observations</i>                              | -                         | 4,952                     | 5,296                     | 2,263 |
| <i>Number of Groups</i>                                    | -                         | 1,963                     | 2,038                     | 2,038 |

General Linear Model (GLM) mixed effects ordinal logistic models with random intercepts for participants and robust standard errors,

adjusted for VIBES-Junior cohort. PedsQL scores across time points initially categorised into three, four and five groups. Five group model chosen (0-<70, 70-<85, 85-<90, 90-<100, 100) to reveal the time variation between participants with mid to high PedsQL scores and score of 100. Model accounts for the ceiling/floor effects of the ordinal outcome and allows response variables with different distributions.

\*Significant results in bold. Adj.=Adjusted; OR=Odds Ratio. ^Injury groupings based on GBD 2013 classifications with reference = Not have injury type, and the order was based on GBD 2013 order. Shaded cell indicates different result to linear mixed effects model. ↓ refers to significantly lower odds of high PedsQL score compared to the reference, ↑ refers to significantly higher odds of high PedsQL score compared to the reference.
